# Supplementary material for: A green process for the oxidative lactonization of 1,2-benzenedimethanol by tungstic acid with aqueous H2O2
Source: Royal Society of Chemistry journal article supplement (doi:10.1039/b921334a), 2009-12-08
Supplement: b921334a.pdf [file b921334a.pdf]

## *Electronic Supplementary Information*

### **A green process for the oxidative lactonization of 1,2-benzenedimethanol by tungstic acid with aqueous H<sub>2</sub>O<sub>2</sub>**

**Quan-jing Zhu, Wei-Lin Dai,\* and Kang-Nian Fan**

*Department of chemistry & Shanghai key laboratory of molecular catalysis and innovative material,  
Fudan University, Shanghai 200433, P. R. China.*

#### **1. Materials.**

1,2-Benzenedimethanol, 50% aqueous H<sub>2</sub>O<sub>2</sub>, *tert*-butanol, acetonitrile, *n*-butanol and iso-propanol were of analytical grade. Tungstic acid was obtained from Sinopharm Chemical Reagent Co., Ltd and of analytical grade. All of the materials were used as received.

#### **2. Catalyst preparation.**

The novel catalytic system was prepared by a simple method: the required amount of tungstic acid was added into aqueous H<sub>2</sub>O<sub>2</sub> at 40 °C. After 0.5 h pre-reaction, the mixture was used as the catalytic system.

#### **3. Procedure for the separation of phthalide under organic solvent-free condition**

In a typical experiment, 0.0135 g of the WO<sub>3</sub>·H<sub>2</sub>O (0.054 mmol) and 0.67 ml of 50 wt% aqueous H<sub>2</sub>O<sub>2</sub> (11.1 mmol) were introduced into the regular glass reactor at 40 °C with vigorous stirring. The reaction was started after the addition of 10 ml of water and 0.690 g of 1,2-benzenedimethanol (5 mmol) into the mixture and was kept for 24 h. Then, the reaction mixture was heated for 0.5 h at 90 °C after the reaction and the excessive H<sub>2</sub>O<sub>2</sub> was decomposed. Thus, the catalyst WO<sub>3</sub>·H<sub>2</sub>O was easily recovered with hot filtration. The filtrate was cooled down and the product phthalide was separated out. Finally, the product was filtrated and dried at room temperature and 77.4% yield of phthalide was obtained. The melting point of the powder obtained by this route is 70.0 to 73.8 °C (Sinopharm Chemical Reagent Co., Ltd, 71.0 to 75.0 °C). The GC purity of the as-prepared phthalide was higher than 99.5%, which can be directly used in many fields.

#### **4. Characterization of the product phthalide**

The <sup>1</sup>H NMR Spectrum of the as-prepared phthalide was recorded on a DMX 500. The X-ray

powder diffraction (XRD) pattern of the as-prepared phthalide was recorded on a German Bruker D8 advance with Cu-K $\alpha$  radiation, operated at 40 kV and 40 mA.

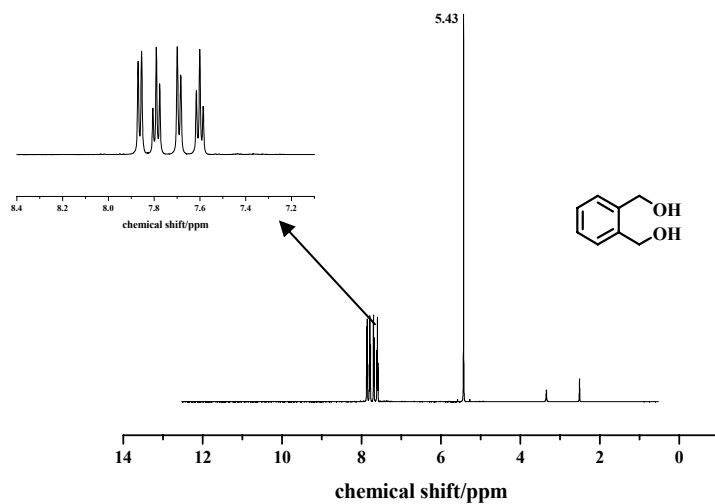

Phthalide: <sup>1</sup>H NMR (DMSO)  $\delta$  7.85 (d, 1 H), 7.79 (t, 1H), 7.69 (d, 1H), 7.60 (t, 3H), 5.43 (s, 2H)

**Figure S1. <sup>1</sup>H NMR of the powder obtained under organic solvent-free condition.**

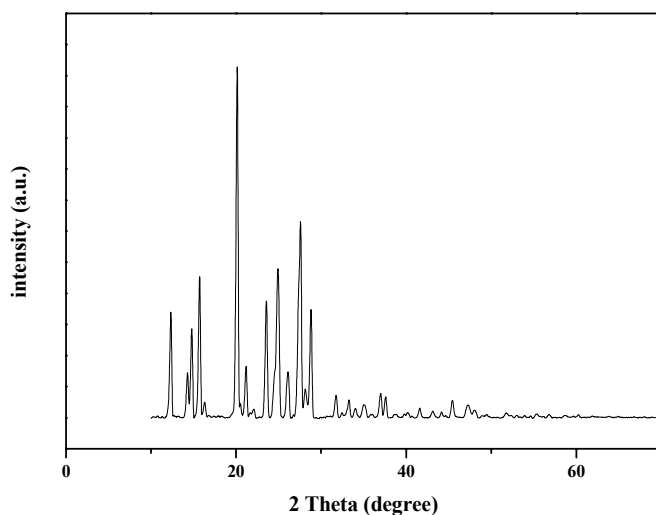

**Figure S2. XRD pattern of the powder obtained under organic solvent-free condition.**

The XRD pattern of the as-prepared phthalide matched well with that of the pure phthalide phase (PDF no.00-032-1841).
